# Supplementary material for: Screening of Lactobacillus spp. for the prevention of Pseudomonas aeruginosa pulmonary infections
Source: PubMed Central journal article supplement (PMC4040502; doi:10.1186/1471-2180-14-107), 2014-04-27
Supplement: 1471-2180-14-107-S1.pdf [file 1471-2180-14-107-S1.pdf]

**Additional file 1: Fermentation patterns of strains active against biofilm formation or elastolytic activity**

|                           | <i>L. fermentum</i> |          |           |           |           |           | <i>L. paracasei</i> | <i>L. zeae</i> |
|---------------------------|---------------------|----------|-----------|-----------|-----------|-----------|---------------------|----------------|
|                           | ES.A.2              | ES.F.115 | K.C6.3.1D | K.C6.3.1E | K.V9.3.2B | K.V9.3.2C | ES.D.88             | Od.76          |
| Glycerol                  | -                   | -        | -         | -         | -         | -         | -                   | +              |
| Erythritol                | -                   | -        | -         | -         | -         | -         | -                   | -              |
| D-Arabinose               | -                   | -        | -         | -         | -         | -         | -                   | +              |
| L-Arabinose               | +                   | +        | -         | -         | -         | -         | -                   | +              |
| D-Ribose                  | +                   | +        | +         | +         | +         | +         | +                   | +              |
| D-Xylose                  | -                   | +        | -         | -         | -         | -         | -                   | -              |
| L-Xylose                  | -                   | -        | -         | -         | -         | -         | -                   | -              |
| D-Adonitol                | -                   | -        | -         | -         | -         | -         | +                   | -              |
| Methyl-βD-Xylopyranoside  | -                   | -        | -         | -         | -         | -         | -                   | -              |
| D-Galactose               | +                   | +        | +         | +         | +         | +         | +                   | +              |
| D-Glucose                 | +                   | +        | +         | +         | +         | +         | +                   | +              |
| D-Fructose                | +                   | +        | +         | +         | +         | +         | +                   | +              |
| D-Mannose                 | -                   | +        | +         | +         | +         | -         | +                   | +              |
| L-Sorbose                 | -                   | -        | -         | -         | -         | -         | -                   | +              |
| L-Rhamnose                | -                   | -        | -         | -         | -         | -         | -                   | +              |
| Dulcitol                  | -                   | -        | -         | -         | -         | -         | -                   | -              |
| Inositol                  | -                   | -        | -         | -         | -         | -         | +                   | +              |
| D-Mannitol                | -                   | -        | -         | -         | -         | -         | +                   | +              |
| D-Sorbitol                | -                   | -        | -         | -         | -         | -         | +                   | +              |
| Methyl-αD-Mannopyranoside | -                   | -        | -         | -         | -         | -         | -                   | -              |
| Methyl-αD-Glucopyranoside | -                   | -        | -         | -         | -         | -         | -                   | +              |
| N-Acetylglucosamine       | -                   | -        | -         | -         | -         | -         | +                   | +              |
| Amygdalin                 | -                   | -        | -         | -         | -         | -         | +                   | +              |
| Arbutin                   | -                   | -        | -         | -         | -         | -         | +                   | ?              |
| Esculin ferric citrate    | +                   | -        | ?         | ?         | -         | -         | +                   | +              |

|                           |   |   |   |   |   |   |   |   |
|---------------------------|---|---|---|---|---|---|---|---|
| Salicin                   | - | - | - | - | - | - | + | + |
| D-Cellobiose              | - | - | - | - | - | - | + | + |
| D-Maltose                 | + | + | + | + | + | + | + | + |
| D-Lactose (bovine origin) | - | + | + | + | + | + | + | + |
| D-Melibiose               | + | + | + | + | + | + | - | - |
| D-Saccharose (sucrose)    | + | + | + | + | + | + | + | + |
| D-Trehalose               | + | - | + | + | - | + | + | + |
| Inulin                    | - | - | - | - | - | - | + | - |
| D-Melezitose              | - | - | - | - | - | - | + | + |
| D-Raffinose               | + | + | + | + | + | + | - | - |
| Amidon (starch)           | - | - | - | - | - | - | - | + |
| Glycogen                  | - | - | - | - | - | - | - | - |
| Xylitol                   | - | - | - | - | - | - | - | - |
| Gentiobiose               | - | - | - | - | - | - | + | + |
| D-Turanose                | - | - | - | - | - | - | + | + |
| D-Lyxose                  | - | - | - | - | - | - | - | - |
| D-Tagatose                | - | - | - | - | - | - | + | + |
| D-Fucose                  | - | - | - | - | - | - | - | - |
| L-Fucose                  | - | - | - | - | - | - | - | + |
| D-Arabitol                | - | - | - | - | - | - | - | + |
| L-Arabitol                | - | - | - | - | - | - | - | - |
| Potassium gluconate       | - | - | ? | ? | - | - | - | - |
| Potassium 2-Ketogluconate | - | - | - | - | - | - | - | - |
| Potassium 5-Ketogluconate | - | - | - | - | - | - | - | - |
